# Supplementary material for: Extreme wave analysis based on atmospheric pattern classification: an application along the Italian coast
Source: Copernicus journal article supplement (doi:10.5194/nhess-20-1233-2020), 2020-05-11
Supplement: Supplementary file 1 [file nhess-20-1233-2020-supplement.pdf]

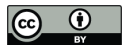

*Supplement of*

## **Extreme wave analysis based on atmospheric pattern classification: an application along the Italian coast**

**Francesco De Leo et al.**

*Correspondence to:* Francesco De Leo ([francesco.deleo@edu.unige.it](mailto:francesco.deleo@edu.unige.it))

The copyright of individual parts of the supplement might differ from the CC BY 4.0 License.

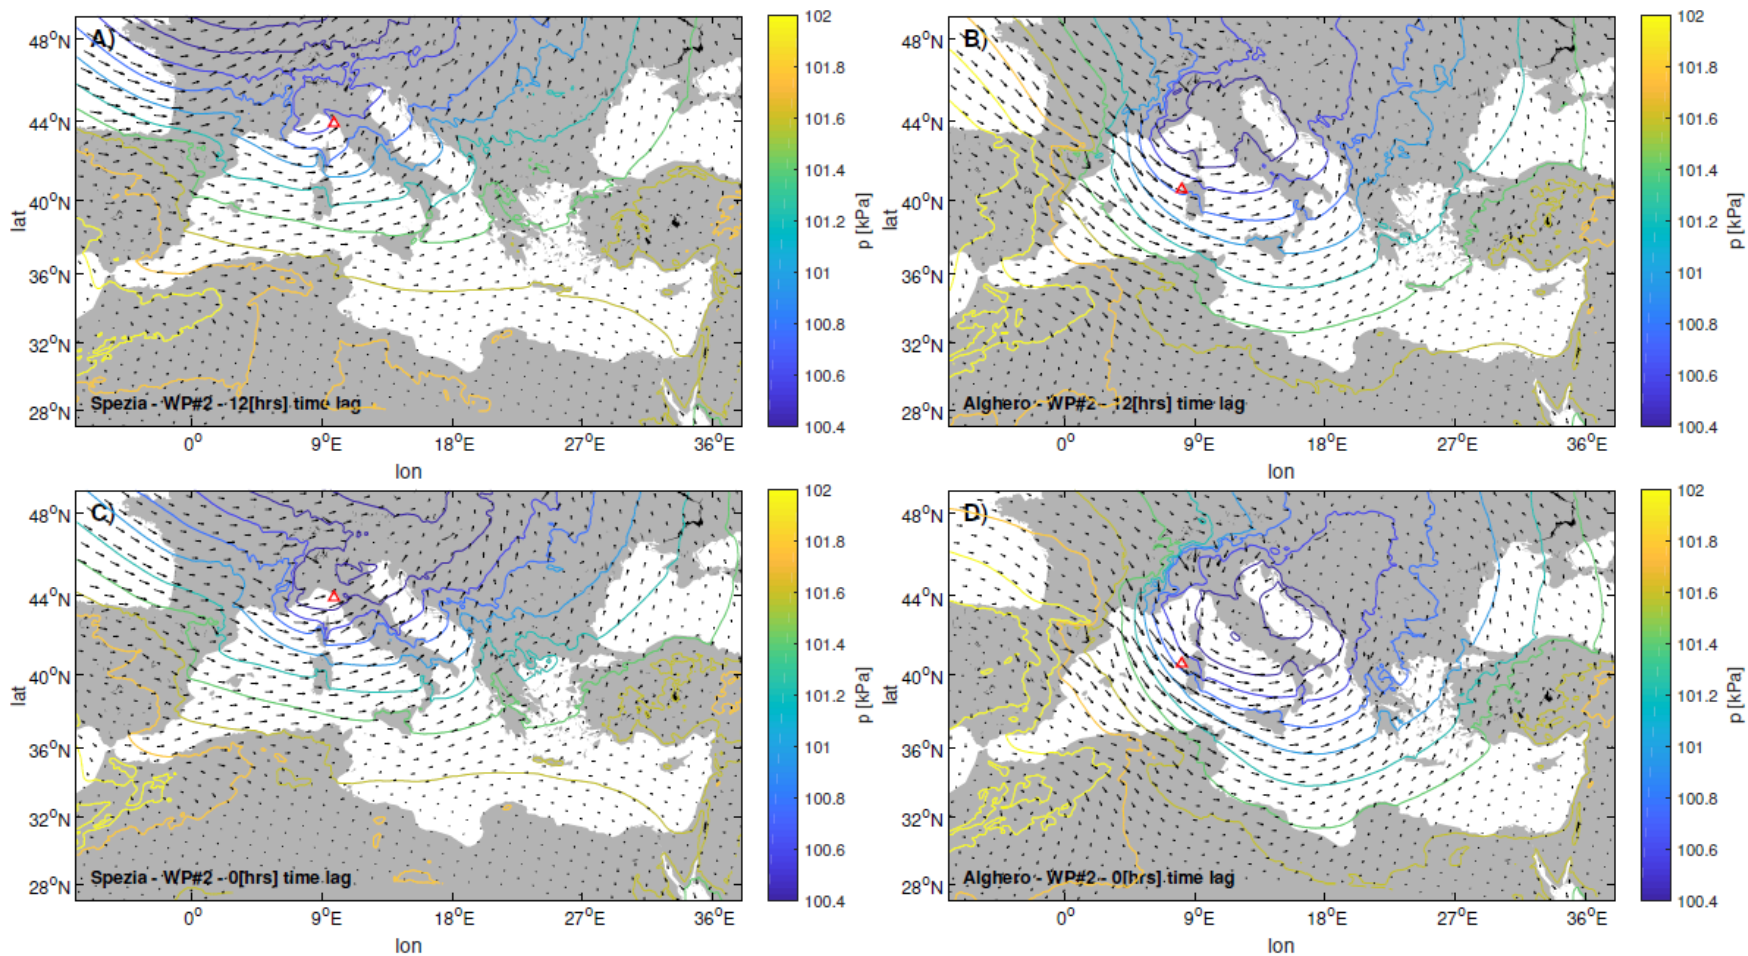

**S1.** Average MSLP for the  $H_s$  peaks of WP#2. Panel A): La Spezia (B1),  $\Delta t$  equals 12 hours; panel B) Alghero (B2),  $\Delta t$  equals 12 hours; panel C): La Spezia,  $\Delta t$  equals 0 hours; panel D): Alghero,  $\Delta t$  equals 0 hours.

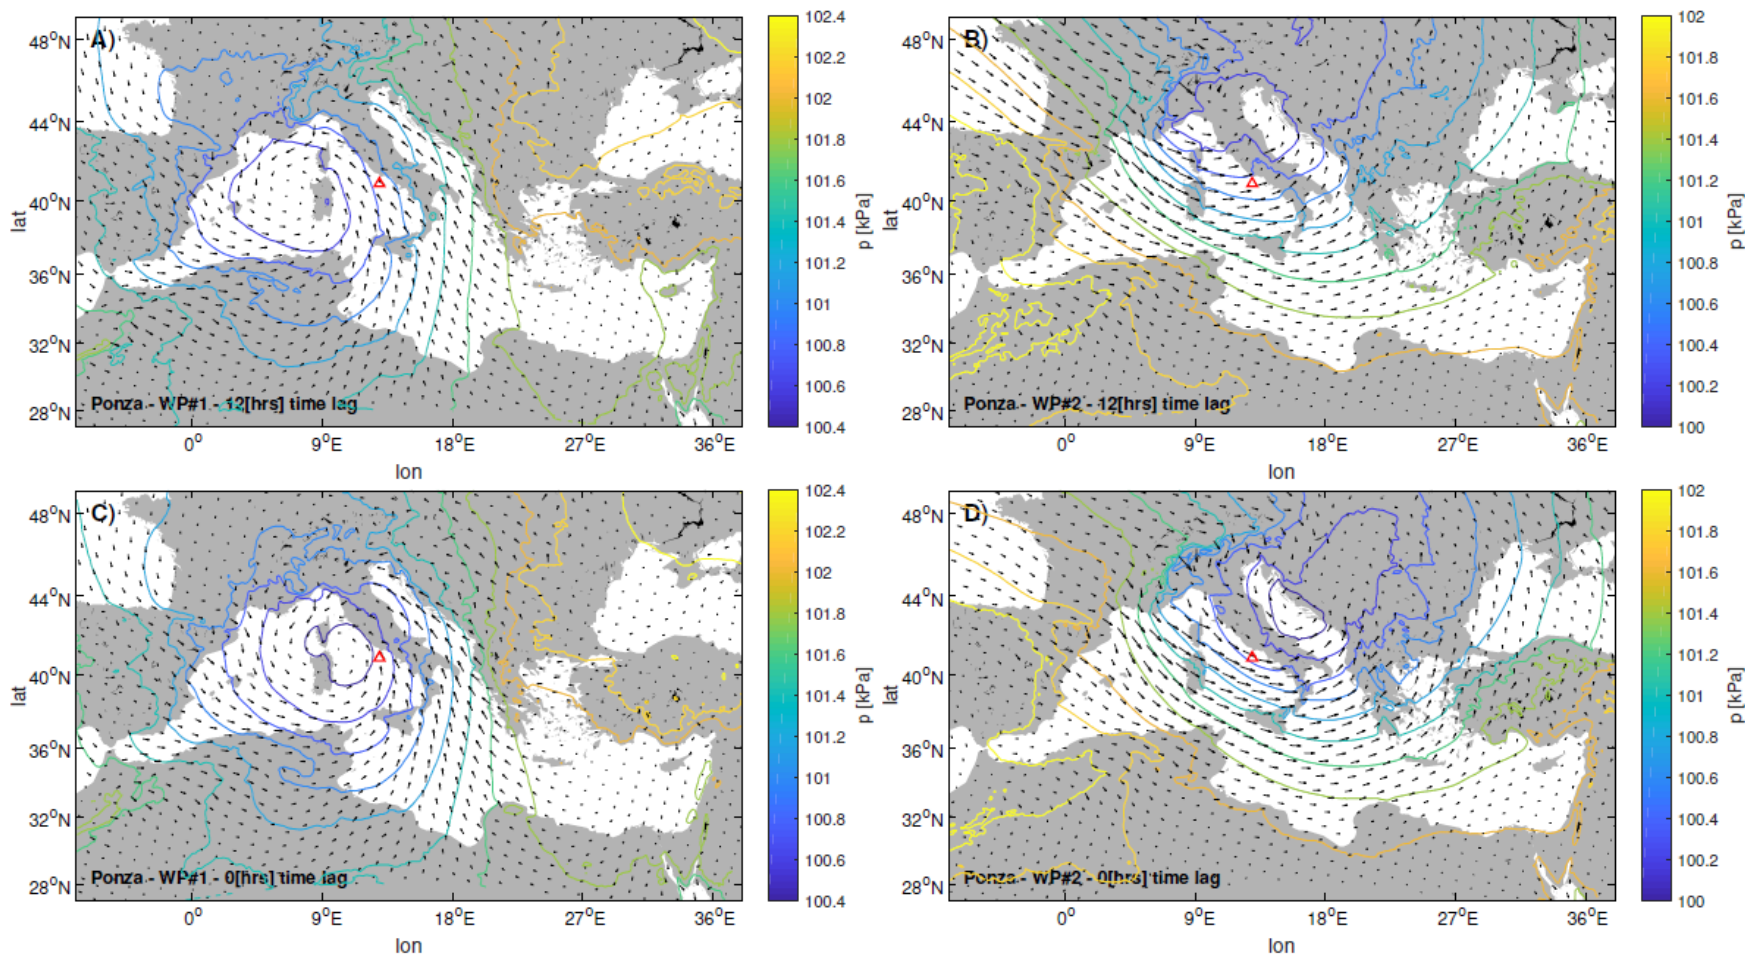

**S2.** Average MSLP for the  $H_s$  peaks in Ponza (B3). Panel A): WP#1,  $\Delta t$  equals 12 hours; panel B) WP#2,  $\Delta t$  equals 12 hours; panel C): WP#1,  $\Delta t$  equals 0 hours; panel D): WP#2,  $\Delta t$  equals 0 hours.

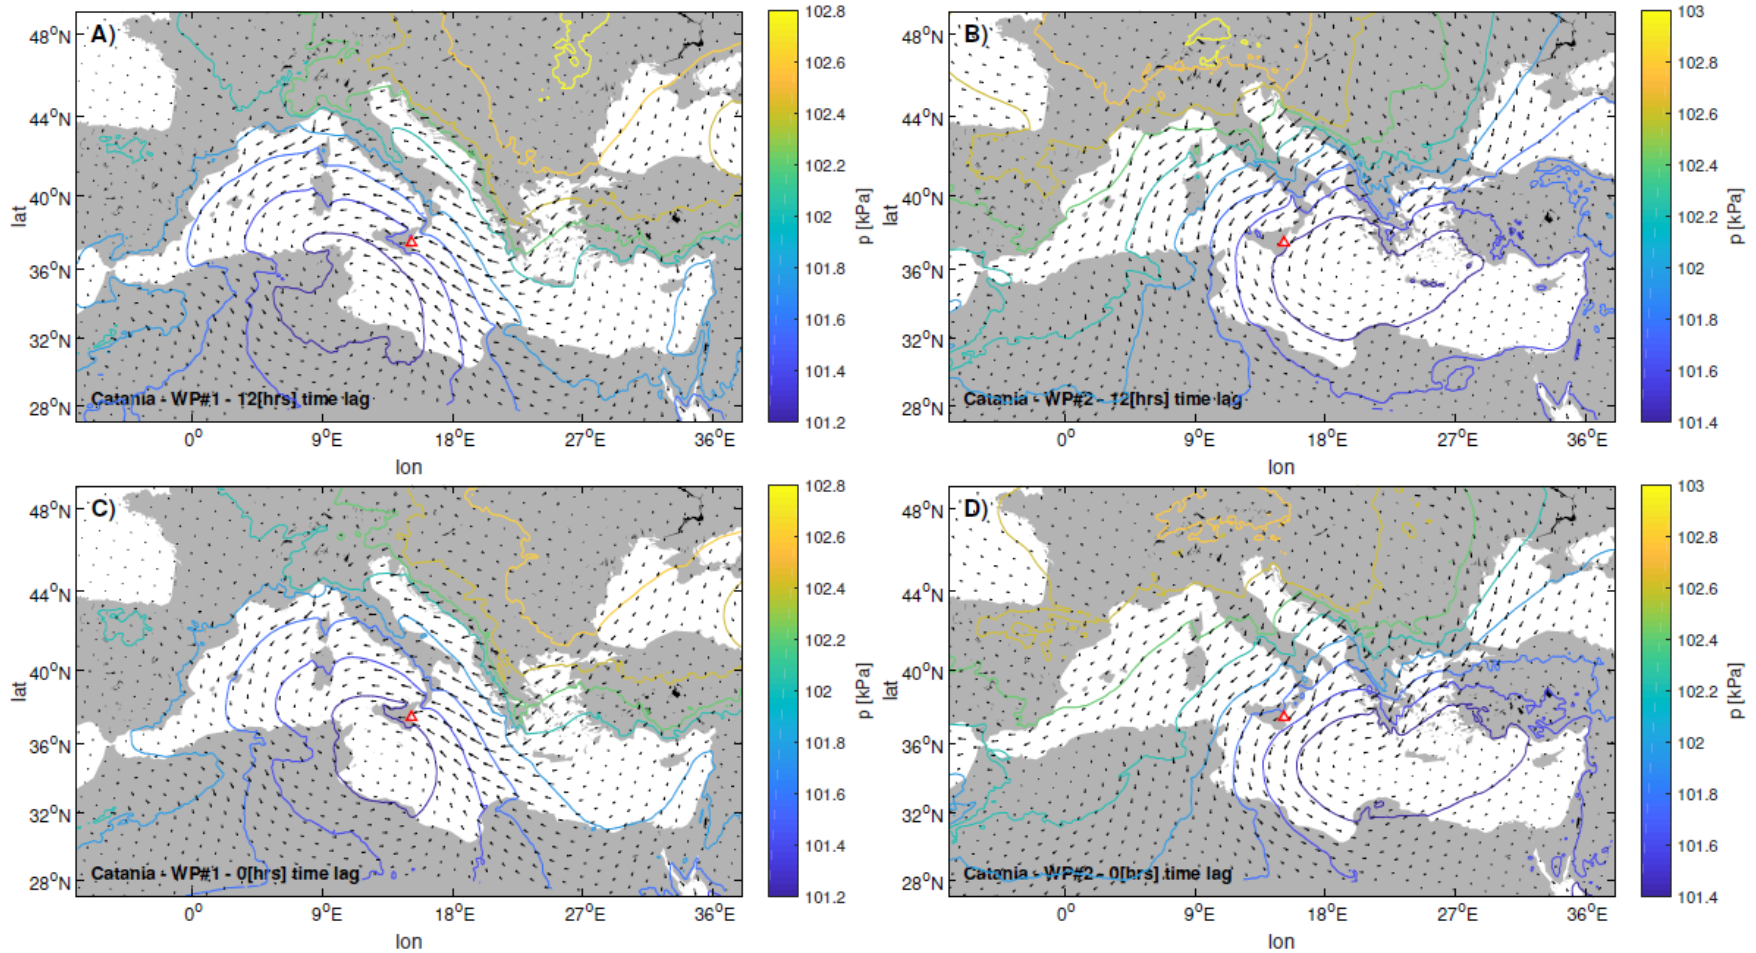

**S3.** Average MSLP for the  $H_s$  peaks in Catania (B5). Panel A): WP#1,  $\Delta t$  equals 12 hours; panel B) WP#2,  $\Delta t$  equals 12 hours; panel C): WP#1,  $\Delta t$  equals 0 hours; panel D): WP#2,  $\Delta t$  equals 0 hours.



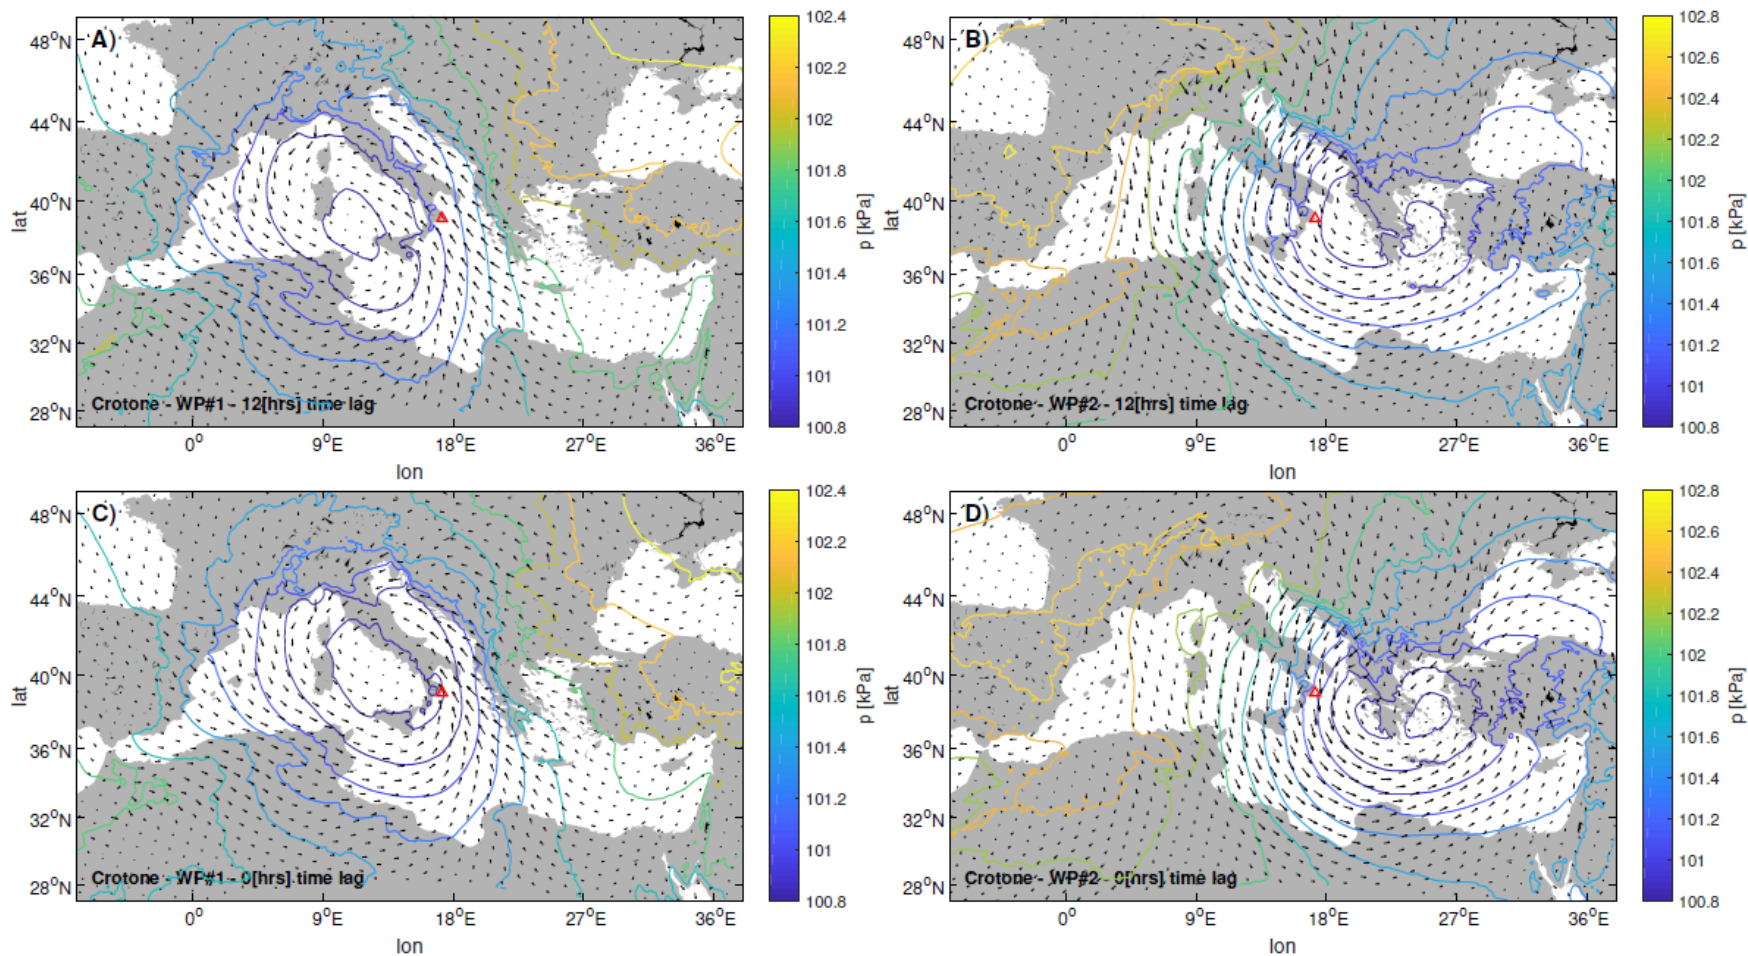

**S4.** Average MSLP for the  $H_s$  peaks in Croton (B6). Panel A): WP#1,  $\Delta t$  equals 12 hours; panel B) WP#2,  $\Delta t$  equals 12 hours; panel C): WP#1,  $\Delta t$  equals 0 hours; panel D): WP#2,  $\Delta t$  equals 0 hours.

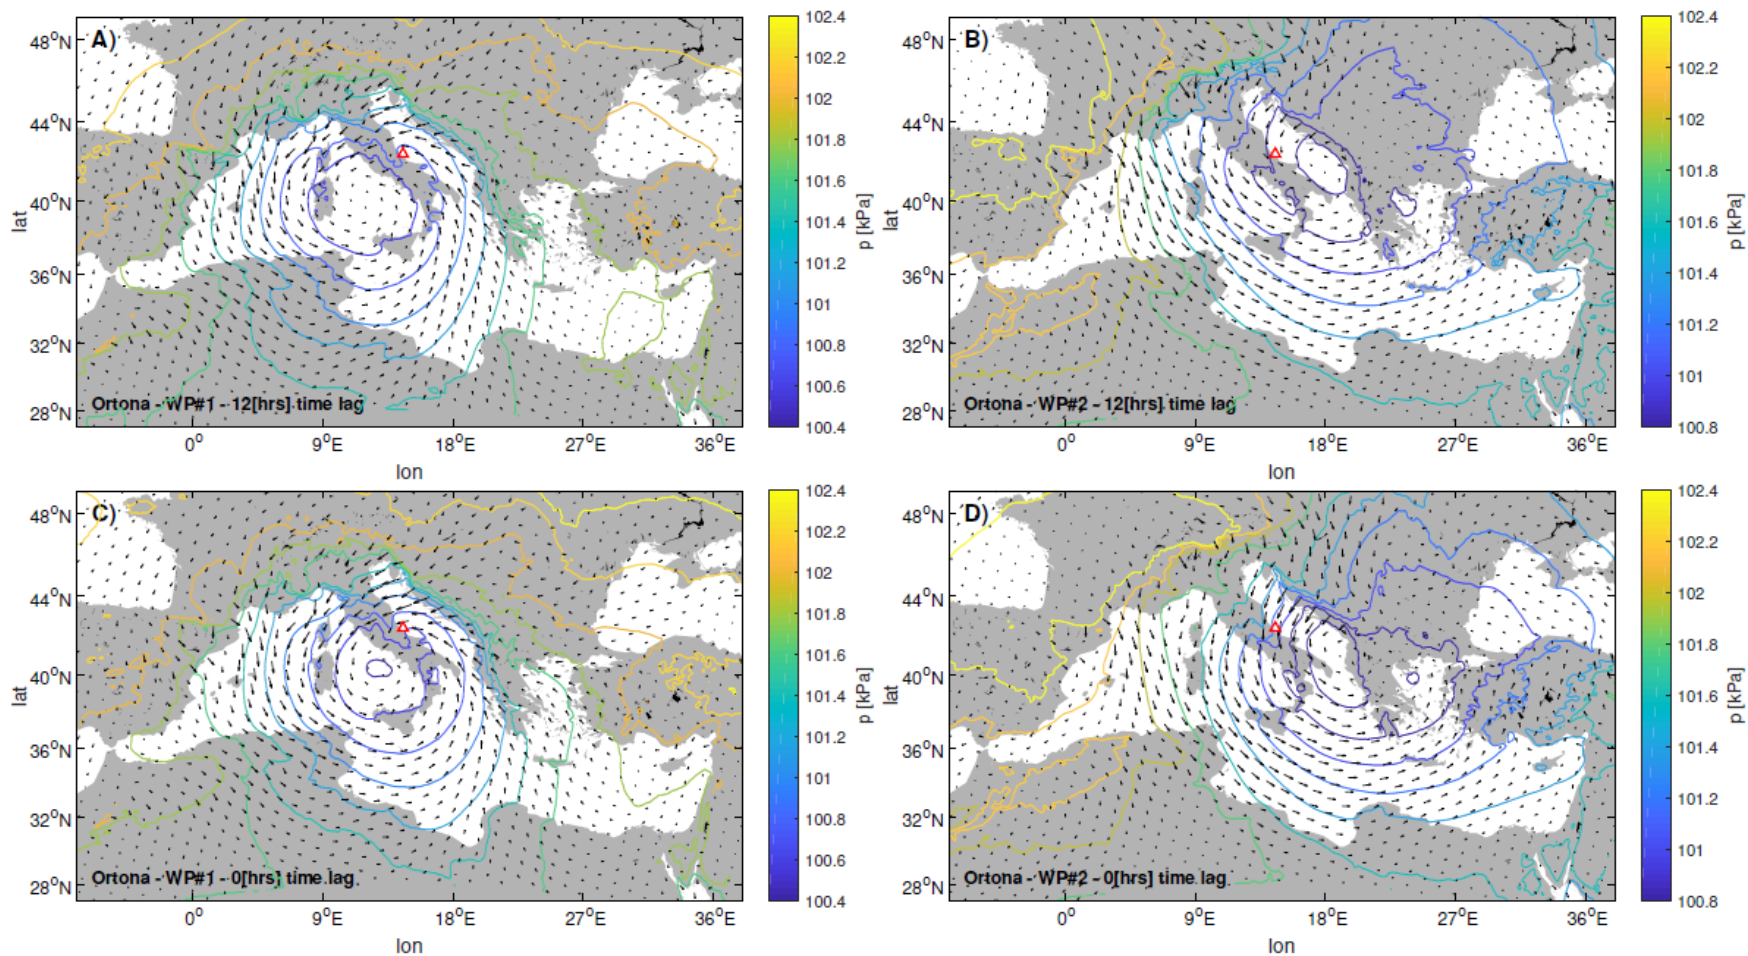

**S5.** Average MSLP for the  $H_s$  peaks in Ortona (B8). Panel A): WP#1,  $\Delta t$  equals 12 hours; panel B) WP#2,  $\Delta t$  equals 12 hours; panel C): WP#1,  $\Delta t$  equals 0 hours; panel D): WP#2,  $\Delta t$  equals 0 hours.

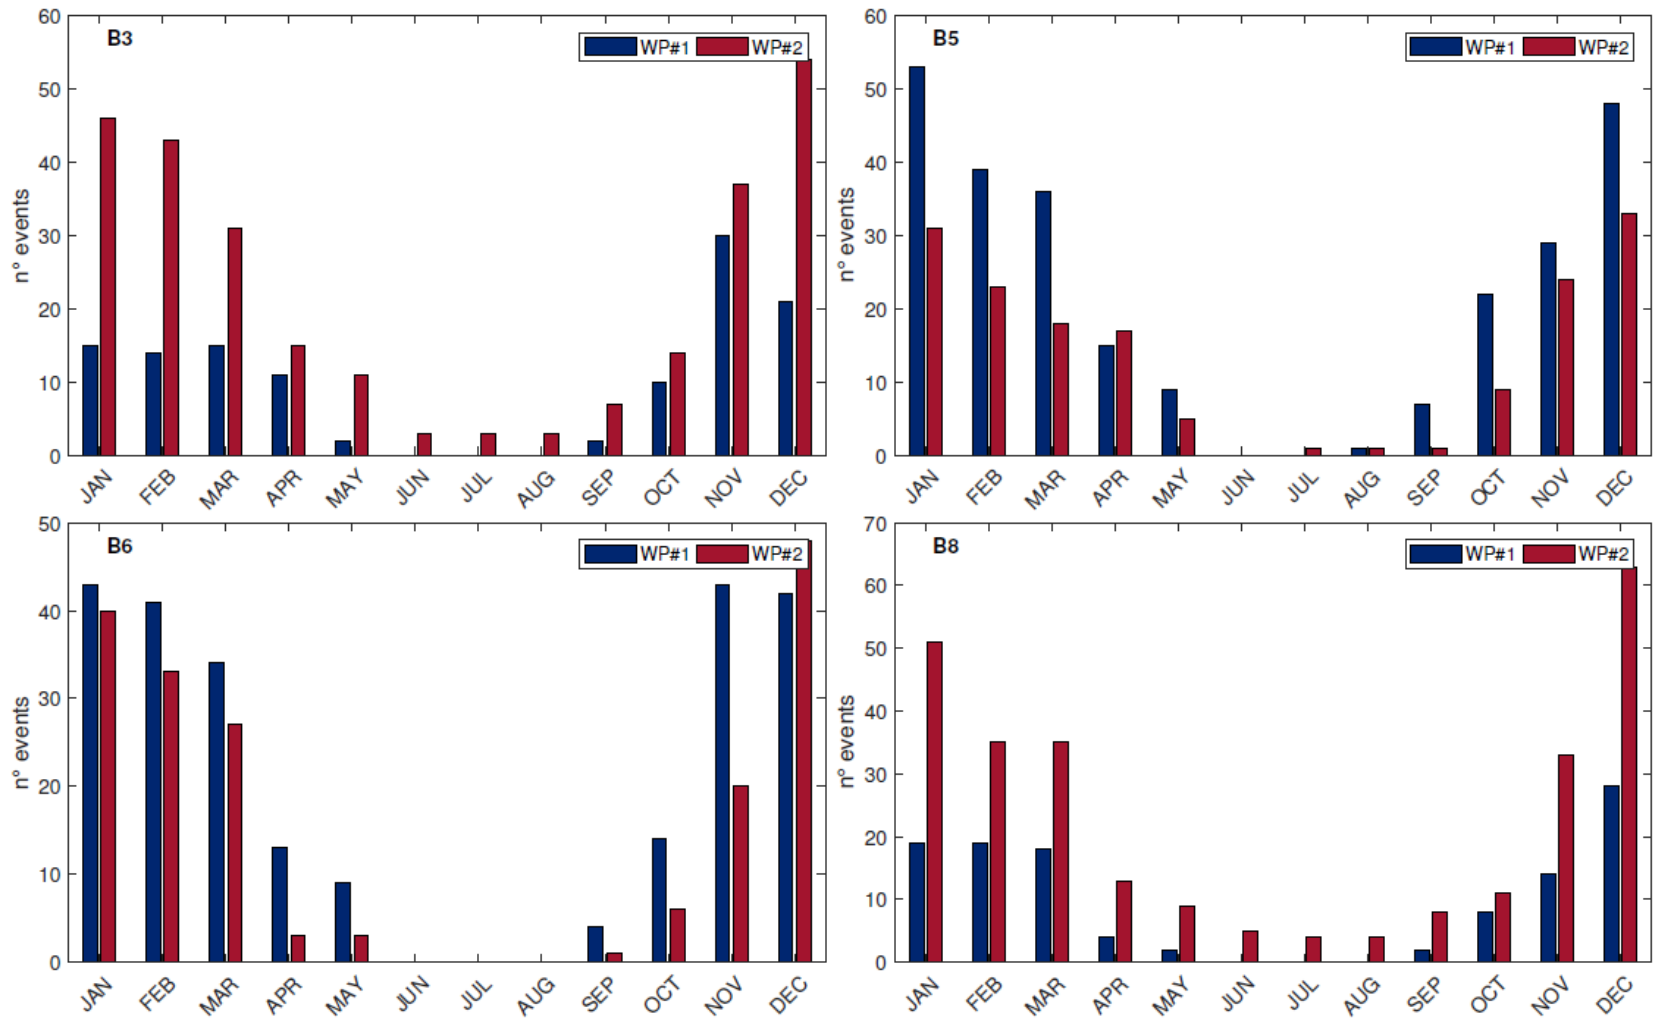

**S6.** Monthly number of events for different WP. The panels show in the upper left corner the code of the location they refer to.

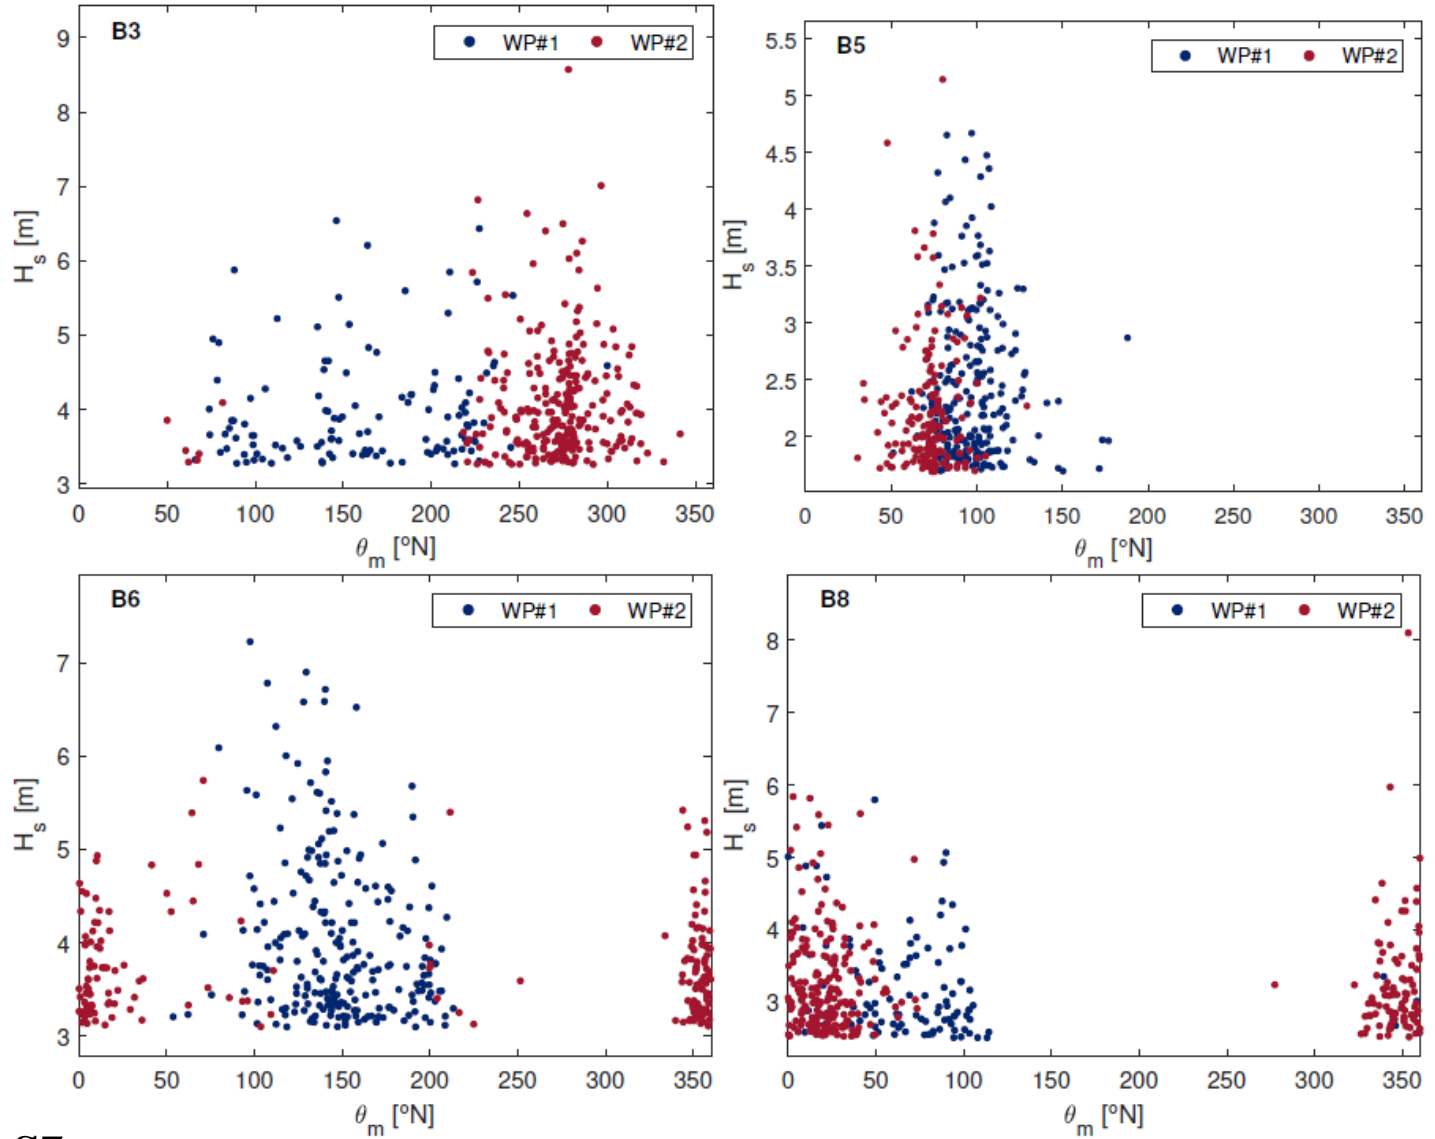

**S7.** Scatter plot of  $H_s$  and  $\theta_m$  due to different WP. The panels show in the upper left corner the code of the location they refer to.



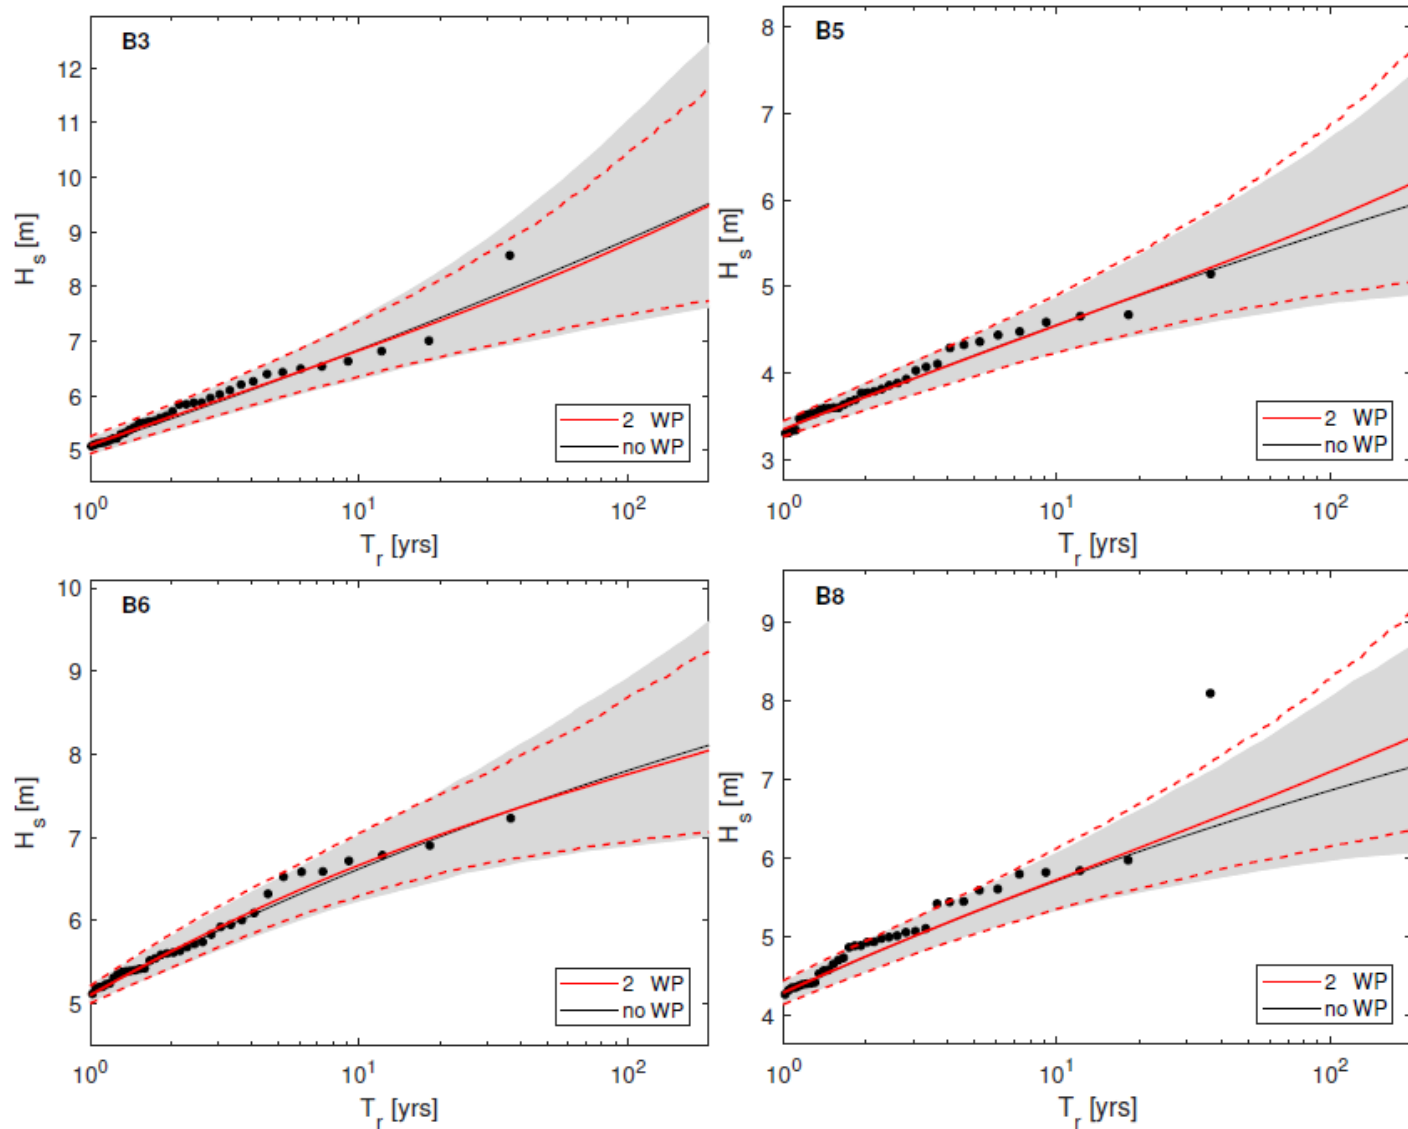

**S8.** Omni-WP extreme value distributions of  $H_s$  obtained from the whole set of peaks (black) and from combining single-WP distributions (red), along with 90% confidence intervals (grey shadow and red dashed lines, respectively). The panels show in the upper left corner the code of the location they refer to.
